# Supplementary material for: Identification and Isolation Pattern of Globisporangium spp. from a Sanionia Moss Colony in Ny-Ålesund, Spitsbergen Is., Norway from 2006 to 2018
Source: MDPI journal article supplement (doi:10.3390/microorganisms9091912), 2021-09-09
Supplement: s1 [file s1]

**Table S1.** Information for *Globisporangium* strains used in the phylogenetic tree of Figure 2.

| Species or taxonomic group                        | Strain   | Time isolated | Location           | ITS sequences                           |                   | Reference     |
|---------------------------------------------------|----------|---------------|--------------------|-----------------------------------------|-------------------|---------------|
|                                                   |          |               |                    | Maximum identity with known species (%) | GenBank accession |               |
| <i>Globisporangium</i> sp. 1                      | OPU1276  | Jul. 2003     | Ny-Ålesund, Norway | 89.8                                    | LC649254          | Present study |
| <i>Globisporangium</i> sp. 1                      | 8G11W1   | Aug. 2008     | Ny-Ålesund, Norway | 89.8                                    | LC644963          | Present study |
| <i>Globisporangium</i> sp. 1                      | 10G16V2  | Aug. 2010     | Ny-Ålesund, Norway | 89.8                                    | LC622526          | Present study |
| <i>Globisporangium</i> sp. 2 ( <i>G. polare</i> ) | 10G15W2  | Aug. 2010     | Ny-Ålesund, Norway | 100                                     | LC644964          | Present study |
| <i>Globisporangium</i> sp. 2 ( <i>G. polare</i> ) | 12G36V1  | Aug. 2012     | Ny-Ålesund, Norway | 100                                     | LC644721          | Present study |
| <i>Globisporangium</i> sp. 2 ( <i>G. polare</i> ) | 18G11V1  | Aug. 2018     | Ny-Ålesund, Norway | 100                                     | LC603672          | Present study |
| <i>Globisporangium</i> sp. 2 ( <i>G. polare</i> ) | 18G12N1  | Aug. 2018     | Ny-Ålesund, Norway | 100                                     | LC603666          | Present study |
| <i>Globisporangium</i> sp. 2 ( <i>G. polare</i> ) | 18G12N2  | Aug. 2018     | Ny-Ålesund, Norway | 99.8                                    | LC603667          | Present study |
| <i>Globisporangium</i> sp. 3                      | 10C17N1  | Aug. 2010     | Ny-Ålesund, Norway | 93.0                                    | LC644965          | Present study |
| <i>Globisporangium</i> sp. 3                      | 12G27W1- | Aug. 2012     | Ny-Ålesund, Norway | 93.0                                    | 12G27W1           | Present study |
| <i>Globisporangium</i> sp. 3                      | 18C29N1  | Aug. 2018     | Ny-Ålesund, Norway | 93.3                                    | LC603664          | Present study |
| <i>Globisporangium</i> sp. 4                      | 10G34N1  | Aug. 2010     | Ny-Ålesund, Norway | 99.0                                    | LC644966          | Present study |
| <i>Globisporangium</i> sp. 4                      | 12G28N1  | Aug. 2012     | Ny-Ålesund, Norway | 99.0                                    | 12G28N1           | Present study |
| <i>Globisporangium</i> sp. 4                      | 18C32N1  | Aug. 2018     | Ny-Ålesund, Norway | 99.1                                    | LC603665          | Present study |
| <i>Globisporangium</i> sp. 4                      | 18G32N1  | Aug. 2018     | Ny-Ålesund, Norway | 99.3                                    | LC603671          | Present study |
| <i>Globisporangium</i> sp. 5                      | 10C12N1  | Aug. 2010     | Ny-Ålesund, Norway | 96.0                                    | LC644967          | Present study |
| <i>Globisporangium</i> sp. 5                      | 18G13N1  | Aug. 2018     | Ny-Ålesund, Norway | 95.0                                    | LC603668          | Present study |
| <i>Globisporangium</i> sp. 5                      | 18G15N1  | Aug. 2018     | Ny-Ålesund, Norway | 96.7                                    | LC603669          | Present study |
| <i>Globisporangium</i> sp. 5                      | 18G31N1  | Aug. 2018     | Ny-Ålesund, Norway | 96.6                                    | LC603670          | Present study |
| <i>Globisporangium</i> sp. 5                      | 18C17N2  | Aug. 2018     | Ny-Ålesund, Norway | 96.1                                    | LC603662          | Present study |
| <i>Globisporangium</i> sp. 5                      | 18C26N1  | Aug. 2018     | Ny-Ålesund, Norway | 96.6                                    | LC603663          | Present study |

|                                         |           |           |                                  |      |          |               |
|-----------------------------------------|-----------|-----------|----------------------------------|------|----------|---------------|
| <i>Globisporangium</i> sp. 5            | 18G37V1   | Aug. 2018 | Ny-Ålesund, Norway               | 95.5 | LC603674 | Present study |
| <i>Globisporangium</i> sp. 6            | 10G26N1   | Aug. 2010 | Ny-Ålesund, Norway               | 87.5 | LC644968 | Present study |
| <i>Globisporangium</i> sp. 6            | 12C19V2   | Aug. 2012 | Ny-Ålesund, Norway               | 87.5 | LC644725 | Present study |
| <i>Globisporangium</i> sp. 6            | 18C14N1   | Aug. 2018 | Ny-Ålesund, Norway               | 86.7 | LC603661 | Present study |
| <i>Globisporangium</i> sp.              | 12G14W1   | Aug. 2012 | Ny-Ålesund, Norway               | 98.6 | LC644724 | Present study |
| <i>Globisporangium spinosum</i>         | CBS275.67 | 1967      | Baarn, Netherlands               |      | HQ643793 | [40]          |
| <i>Globisporangium mamillatum</i>       | CBS251.28 | 1928      | Netherlands                      |      | HQ643687 | [40]          |
| <i>Globisporangium debaryanum</i>       | CBS752.96 | Un-known  | UK                               |      | HQ643519 | [40]          |
| <i>Globisporangium terrestris</i>       | CBS112352 | Un-known  | Lille, France                    |      | HQ643857 | [40]          |
| <i>Globisporangium sylvaticum</i>       | CBS453.67 | 1967      | Georgia, USA                     |      | AY598645 | [40]          |
| <i>Globisporangium polare</i>           | CBS118203 | 1999      | Longyearbyen, Norway             |      | KJ716859 | [22,39]       |
| <i>Globisporangium canariense</i>       | CBS112353 | Un-known  | Canary Islands, Spain            |      | HQ643482 | [40]          |
| <i>Globisporangium iwayamai</i>         | CBS156.64 | 1962      | Bundaleer North, Australia       |      | HQ643669 | [40]          |
| <i>Globisporangium violae</i>           | CBS159.64 | 1962      | Bundaleer North, Australia       |      | AY598706 | [40]          |
| <i>Globisporangium okanoganense</i>     | CBS315.81 | 1977      | Oregon, USA                      |      | HQ643714 | [40]          |
| <i>Globisporangium paddicum</i>         | CBS698.83 | 1982      | Fukui Pref., Japan               |      | HQ643728 | [40]          |
| <i>Globisporangium nagaii</i>           | CBS779.96 | Un-known  | Unknown                          |      | AY598705 | [40]          |
| <i>Globisporangium middletonii</i>      | CBS528.74 | 1969      | Zuidelijk Flevoland, Netherlands |      | HQ643694 | [40]          |
| <i>Globisporangium multisporum</i>      | CBS470.50 | 1947      | Illinois, USA                    |      | HQ643700 | [40]          |
| <i>Globisporangium takayamanum</i>      | CBS122492 | 2004      | Takayama, Japan                  |      | HQ643853 | [40]          |
| <i>Globisporangium minus</i>            | CBS226.88 | 1985      | Berkshire, UK                    |      | HQ643696 | [40]          |
| <i>Globisporangium echinulatum</i>      | CBS281.64 | 1962      | Caroline, Australia              |      | HQ643531 | [40]          |
| <i>Globisporangium rostratum</i>        | CBS533.74 | 1971      | Oostelijk Flevoland, Netherlands |      | HQ643767 | [40]          |
| <i>Globisporangium rostratifyingens</i> | CBS383.34 | 1933      | Netherlands                      |      | HQ643762 | [40]          |

|                        |           |      |           |          |      |
|------------------------|-----------|------|-----------|----------|------|
| <i>Globisporangium</i> | CBS139567 | Apr. | Kandovan, | KP938427 | [41] |
| <i>kandovanense</i>    |           | 2014 | Iran      |          |      |
| <i>Pythium</i>         | CBS28779  | 1979 | Bulgaria  | HQ643439 | [40] |
| <i>aphanidermatum</i>  |           |      |           |          |      |
